# Supplementary material for: Correlating the surface structure and hydration of a γ-Al2O3 support with the Run (n = 1–4) cluster adsorption behavior: a density functional theory study
Source: Royal Society of Chemistry journal article supplement (doi:10.1039/c5ra28173c), 2016-01-01
Supplement: c5ra28173c1.pdf [file c5ra28173c1.pdf]

Electronic Supplementary Information

**Correlating the Surface Structure and Hydration of  $\gamma$ -Al<sub>2</sub>O<sub>3</sub> Support  
with the Ru<sub>n</sub> (n=1-4) Clusters Adsorption Behavior: A Density  
Functional Theory Study**

J. Yang,<sup>a</sup> H. Wang,<sup>b</sup> X. Zhao,<sup>b</sup> Y. L. Li<sup>b</sup> and W.L. Fan<sup>a\*</sup>

<sup>a</sup> Key Laboratory for Colloid and Interface Chemistry of State Educating Ministry,  
School of Chemistry and Chemical Engineering, Shandong University, Jinan 250100,  
China. Fax: +86-531-88364864; Tel: +86-531-88366330; E-mail: fwl@sdu.edu.cn

<sup>b</sup> State Key Laboratory of Crystal Materials, Shandong University, Jinan 250100, China

Financial support from the National Natural Science Foundation of China (Grant no.:  
21173131) and the Taishan Scholar Project of Shandong Province is gratefully  
acknowledged.

## 1. The choice for the computation details:

The convergence test in Figure S1 showed the change of bulk energy became very few from the 340 eV. In other words, the 340 eV was suitable for conducting the computation.

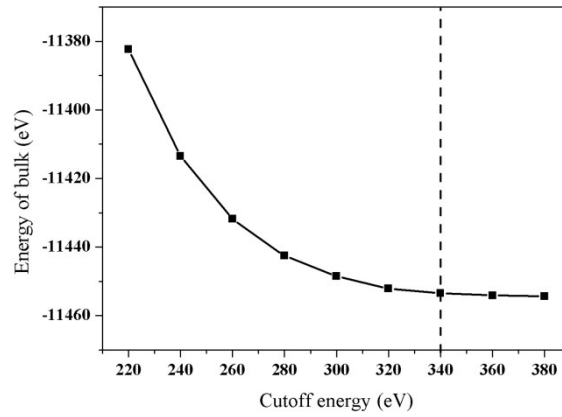

Figure S1. The convergence test for cutoff energy of the slab.

## 2. The test for the slab model

### (1) The test for vacuum thickness

Based on the data in Figure S2, the surface energy became very few from the 12 Å, indicating the vacuum thickness chosen to 12 Å was long enough to shield the self-interaction of the periodic boundary conditions.

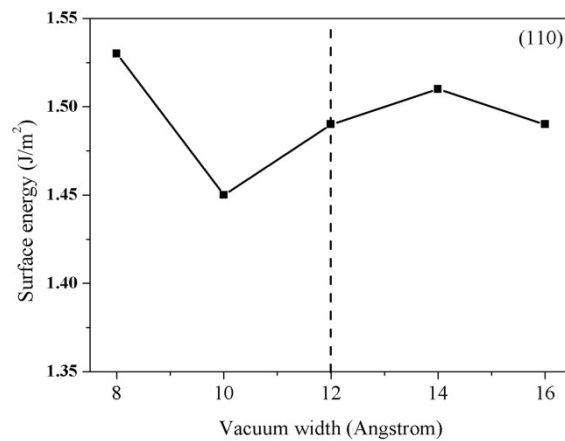

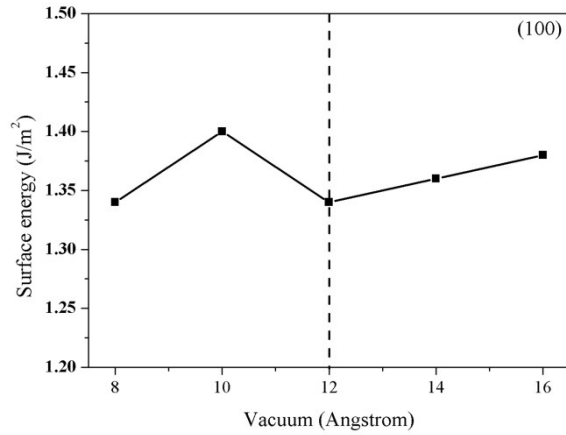

Figure S2. The convergence tests for the thickness of vacuum slab on the (100) and (110) surfaces.

(2) The choice of the slab terminations:

As presented in Figure S3, the (110) and (100) surface have different terminations: the  $O_{4c}-Al_{3c}-2O_{2c}$ ,  $O_{2c}-Al_{3c}-2O_{3c}$  or  $O_{4c}-Al_{3c}-2O_{3c}$  terminations on (110) and  $Al_{5c}$  or  $Al_{2c}$  terminations on (100) surfaces. A comparison of surface energies indicates that  $O_{4c}-Al_{3c}-2O_{2c}$  terminated (110) and  $Al_{5c}$  terminated (100) have much lower surface energies than others (as is shown in Table S1).

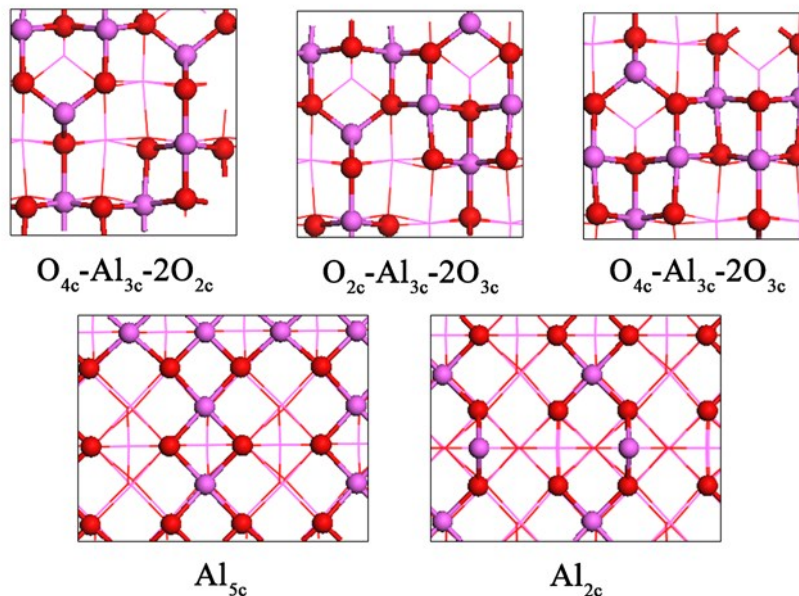

Figure S3. Top views of (110) and (100) surface with different terminations.

Table S1. The surface energies of (110) and (100) surface with different terminations.

| Surface plane | Terminations                                        | Surface energy (J/m <sup>2</sup> ) |
|---------------|-----------------------------------------------------|------------------------------------|
| (110)         | O <sub>4c</sub> -Al <sub>3c</sub> -2O <sub>2c</sub> | 1.42                               |
|               | O <sub>2c</sub> -Al <sub>3c</sub> -2O <sub>3c</sub> | 1.45                               |
|               | O <sub>4c</sub> -Al <sub>3c</sub> -2O <sub>3c</sub> | 1.65                               |
| (100)         | Al <sub>5c</sub>                                    | 0.92                               |
|               | Al <sub>2c</sub>                                    | 1.64                               |

### 3. The potential energy profiles for the dissociation of H<sub>2</sub>O on dehydrated (110) and (100) surfaces

The transition states for possible dissociation states of H<sub>2</sub>O on (110) and (100) surface was tested (Table S2). It can be found dissociation of H<sub>2</sub>O at Al<sub>3c</sub>-O<sub>2c3</sub> site is more preferred than that at Al<sub>4c</sub>-O<sub>2c1</sub> site. Moreover, the dissociation process of water across the Al<sub>5c2</sub>-O<sub>b</sub> site with an activation energy of 1.74 eV is more exothermic than that on others. The reaction transition states, intermediates and products involved in are shown in Figure S4 and Figure S5.

Table S2. The activation energy (E<sub>a</sub>), reaction energy (ΔE) for the hydroxylation process the(110) and (100) surfaces.

| (110)               | Al3c-O2c3 | Al4c-O2c1 |          |          |
|---------------------|-----------|-----------|----------|----------|
| E <sub>a</sub> (eV) | 0.70      | 0.62      |          |          |
| ΔE (eV)             | -1.06     | -0.31     |          |          |
| (100)               | Al5c2-Ob  | Al5c2-Oa  | Al5c1-Oc | Al5c1-Oa |
| E <sub>a</sub> (eV) | 1.74      | 2.32      | 1.79     | 2.40     |
| ΔE (eV)             | -0.35     | 1.28      | 0.78     | 1.35     |

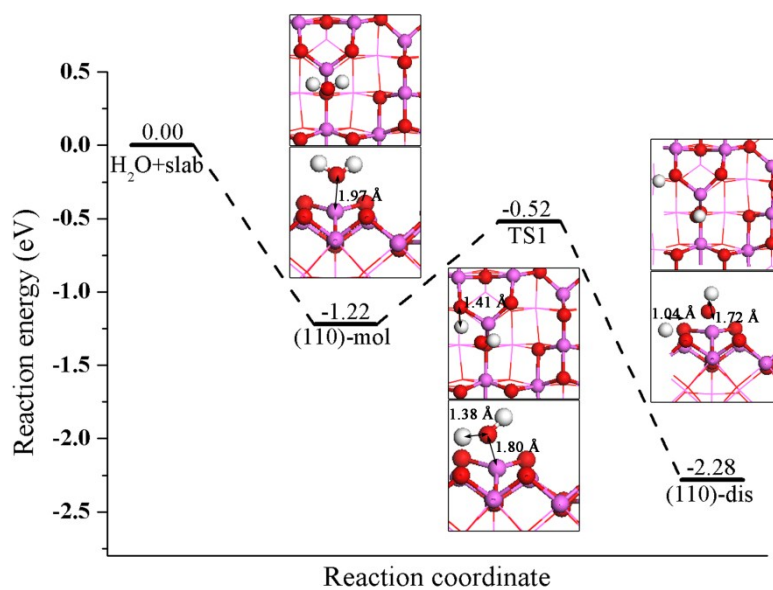

Figure S4. The potential energy profile for H<sub>2</sub>O dissociation on the dehydrated (110) surface. Structures of the initial, transition and final states are included.

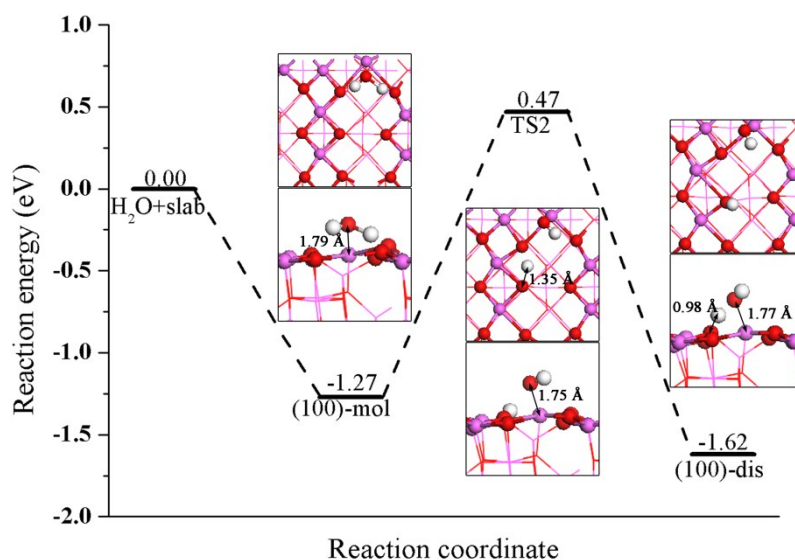

Figure S5. The potential energy profile for H<sub>2</sub>O dissociation on the dehydrated (100) surface. Structures of the initial, transition and final states are included.

#### 4. The optimized configurations for less stable adsorption

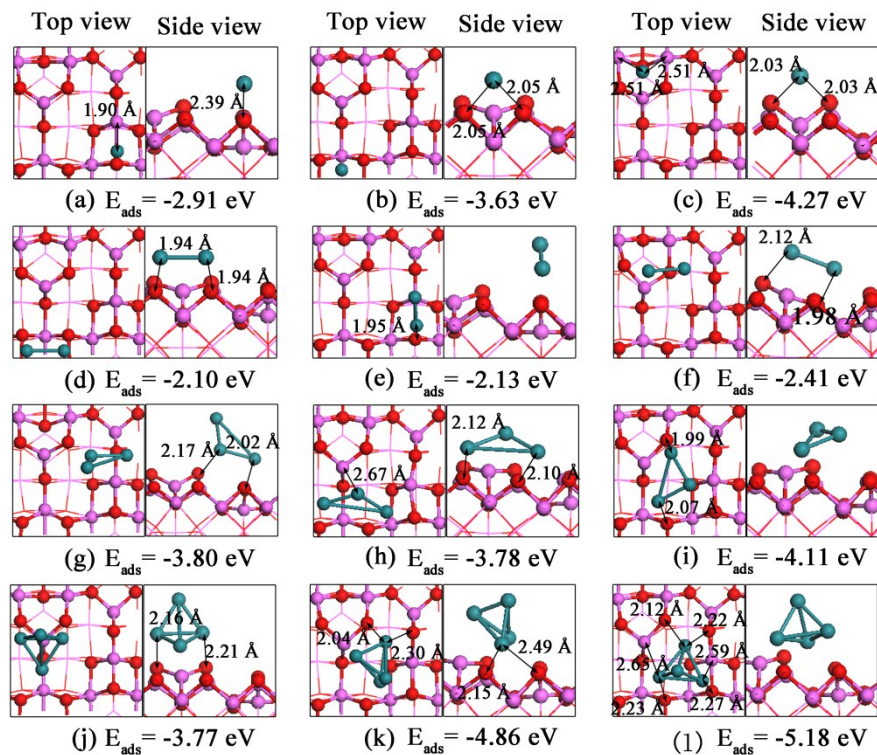

Figure S6. The possible adsorption states for  $\text{Ru}_n$  ( $n=1-4$ ) clusters on dehydrated (110) surface.

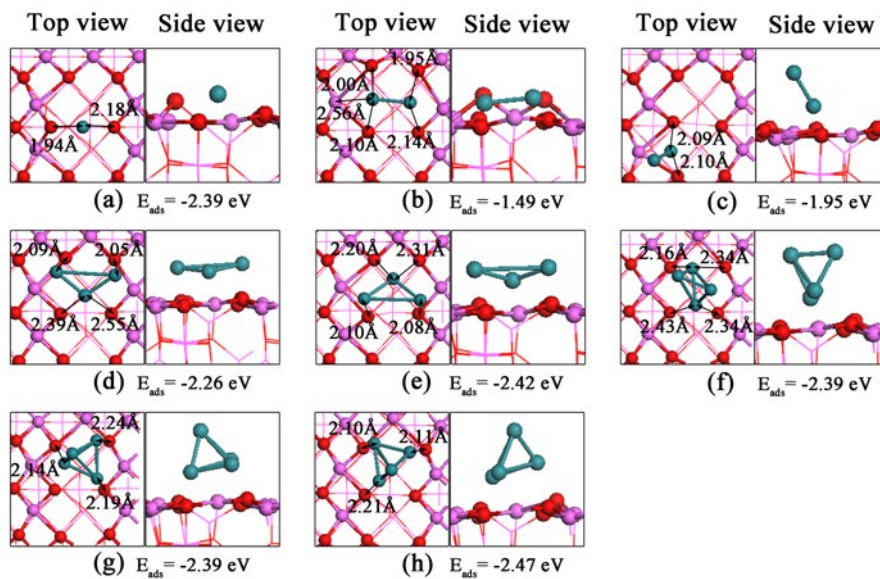

Figure S7. The possible adsorption states for  $\text{Ru}_n$  ( $n=1-4$ ) clusters on dehydrated (100) surface.

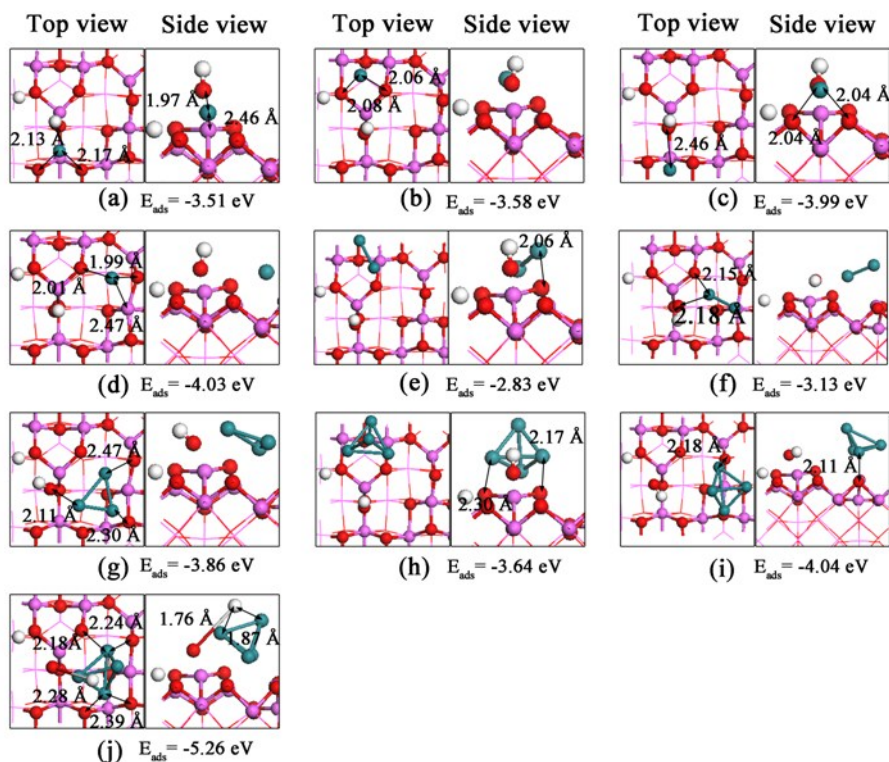

Figure S8. The possible adsorption states for Ru<sub>n</sub> (n=1-4) clusters on hydrated (110) surface.

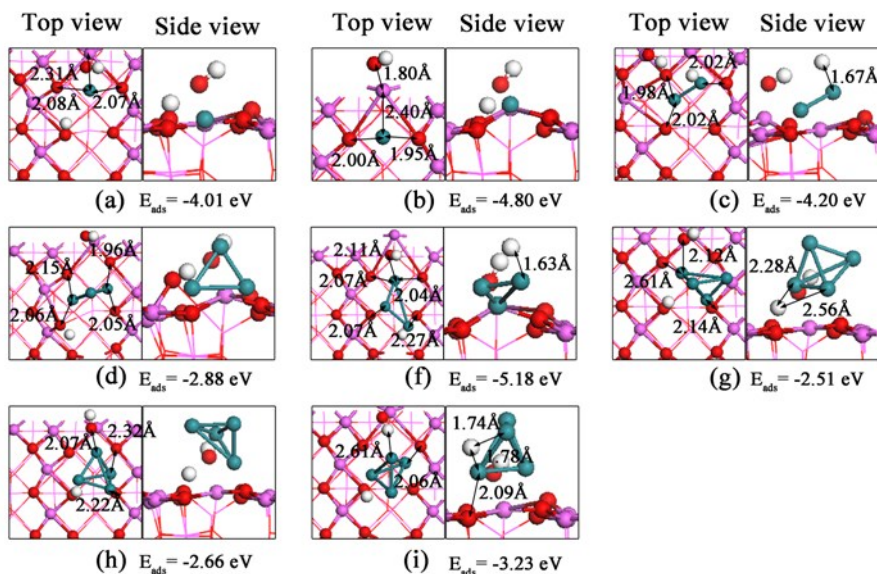

Figure S9. The possible adsorption states for Ru<sub>n</sub> (n=1-4) clusters on hydrated (100) surface.

## 5. The effect of spin-polarized on adsorption

The spin-polarized calculations are performed on favorable configurations of Ru<sub>n</sub> (n=1-4) clusters adsorption. Comparing the adsorption energy of each configuration spin-restricted and spin-unrestricted (Table S3), we can see the difference between them is within 0.01-0.22 eV, comprising few percent of the adsorption energies. Furthermore, population analysis (as shown in Table S4-7) based on spin-

unrestricted indicates the Ru<sub>n</sub> cluster- support interaction is similar to back-donation interaction, where Ru and O atom is charge deficit and Al atom is charge abundant. Calculations show that the spin-polarize induces subtle variation of Mulliken charge for involved sites (less than 0.08 |e|). This means that the spin-polarized of Ru<sub>n</sub> cluster has little effect on the adsorption energies and charge transfer for Ru<sub>n</sub> cluster adsorption on Al<sub>2</sub>O<sub>3</sub> support.

Table S3. The adsorption energies of most stable configurations for spin-restricted and spin-unrestricted Ru<sub>n</sub> (n=1-4) clusters on dehydrated and hydrated  $\gamma$ -Al<sub>2</sub>O<sub>3</sub> (110) and (100) surfaces

| surface |                   | E <sub>ads</sub> (eV) |                 |                 |                 |
|---------|-------------------|-----------------------|-----------------|-----------------|-----------------|
|         |                   | Ru <sub>1</sub>       | Ru <sub>2</sub> | Ru <sub>3</sub> | Ru <sub>4</sub> |
| D(110)  | spin-restricted   | -4.33                 | -3.76           | -4.73           | -5.18           |
|         | spin-unrestricted | -4.44                 | -3.94           | -4.89           | -5.34           |
| D(100)  | spin-restricted   | -4.62                 | -2.18           | -3.66           | -3.31           |
|         | spin-unrestricted | -4.71                 | -2.11           | -3.78           | -3.23           |
| H(110)  | spin-restricted   | -4.39                 | -3.22           | -4.18           | -4.48           |
|         | spin-unrestricted | -4.34                 | -3.44           | -4.36           | -4.58           |
| H(100)  | spin-restricted   | -4.71                 | -3.14           | -4.26           | -3.69/-3.63     |
|         | spin-unrestricted | -4.70                 | -3.10           | -4.15           | -3.87/-3.65     |

Table S4. Mulliken charges of spin-restricted and spin-unrestricted Ru<sub>n</sub> (n=1-4) adsorption in stable configurations on the dehydrated  $\gamma$ -Al<sub>2</sub>O<sub>3</sub> (110) surface.

| Mulliken charges,  e | Ru <sub>n</sub> | O <sub>2c1</sub> | O <sub>2c2</sub> | O <sub>3c1</sub> | O <sub>3c2</sub> | O <sub>3c3</sub> | Al <sub>3c</sub> | Al <sub>4c</sub> |
|----------------------|-----------------|------------------|------------------|------------------|------------------|------------------|------------------|------------------|
| D(110)               |                 | -1.17            | -1.16            | -1.12            | -1.13            | -1.13            | 1.78             | 1.79             |
| D(110)-1a            | 0.29            | -0.99            | -1.04            | -1.11            | -1.13            | -1.13            | 1.74             | 1.41             |
| D(110)-2a            | 0.33            | -1.07            | -1.02            | -1.10            | -1.01            | -1.10            | 1.38             | 1.50             |
| D(110)-3             | 0.38            | -1.12            | -1.02            | -0.97            | -0.99            | -1.08            | 1.36             | 1.41             |
| D(110)-4             | 0.46            | -1.02            | -1.03            | -1.00            | -1.01            | -1.10            | 1.36             | 1.40             |



Table S5. Mulliken charges of spin-restricted and spin-unrestricted Ru<sub>n</sub> (n=1-4) adsorption in stable configurations on the dehydrated  $\gamma$ -Al<sub>2</sub>O<sub>3</sub> (100) surface.

| Mulliken charges,  e | Ru <sub>n</sub> | O <sub>a</sub> | O <sub>b</sub> | O <sub>c</sub> | O <sub>d</sub> | O <sub>E</sub> | Al <sub>5c1</sub> | Al <sub>5c2</sub> | Al <sub>5c3</sub> |
|----------------------|-----------------|----------------|----------------|----------------|----------------|----------------|-------------------|-------------------|-------------------|
| D(100)               | -               | -1.17          | -1.11          | -1.11          | -1.07          | -1.10          | 1.70              | 1.65              | 1.66              |
| D(100)-1             | 0.09            | -1.15          | -1.10          | -1.00          | -0.97          | -1.10          | 1.67              | 1.31              | 1.64              |
| D(100)-2             | 0.19            | -1.14          | -1.03          | -0.99          | -0.96          | -1.14          | 1.65              | 1.29              | 1.68              |
| D(100)-3             | 0.02            | -1.15          | -0.96          | -0.99          | -0.94          | -1.12          | 1.50              | 1.36              | 1.66              |
| D(100)-4             | 0.16            | -1.15          | -0.98          | -1.00          | -1.01          | -1.04          | 1.52              | 1.35              | 1.48              |

Table S6. Mulliken charges of spin-restricted and spin-unrestricted Ru<sub>n</sub> (n=1-4) adsorption in stable configurations on the hydrated  $\gamma$ -Al<sub>2</sub>O<sub>3</sub> (110) surface.

| Mulliken charges,  e | Ru <sub>n</sub> | O <sub>2c1</sub> | O <sub>2c2</sub> | O <sub>3c1</sub> | O <sub>3c2</sub> | O <sub>w</sub> | Al <sub>3c</sub> | Al <sub>4c</sub> |
|----------------------|-----------------|------------------|------------------|------------------|------------------|----------------|------------------|------------------|
| H(110)               |                 | -1.14            | -1.20            | -1.12            | -1.13            | -1.13          | 1.85             | 1.80             |
| H(110)-1             | 0.30            | -1.13            | -1.18            | -1.06            | -1.00            | -0.96          | 1.80             | 1.37             |
| H(110)-2             | 0.36            | -1.06            | -1.06            | -1.10            | -0.99            | -0.93          | 1.68             | 1.36             |
| H(110)-3             | 0.28            | -0.99            | -1.07            | -1.09            | -1.01            | -0.96          | 1.78             | 1.25             |
| H(110)-4             | 0.34            | -1.03            | -1.06            | -1.02            | -1.01            | -0.96          | 1.69             | 1.31             |

Table S7. Mulliken charges of spin-restricted and spin-unrestricted Ru<sub>n</sub> (n=1-4) adsorption in stable configurations on the hydrated  $\gamma$ -Al<sub>2</sub>O<sub>3</sub> (110) surface.

| Mulliken charges,  e | Ru <sub>n</sub> | O <sub>a</sub> | O <sub>b</sub> | O <sub>c</sub> | O <sub>d</sub> | O <sub>w</sub> | H <sub>a</sub> | Al <sub>5c4</sub> |
|----------------------|-----------------|----------------|----------------|----------------|----------------|----------------|----------------|-------------------|
| H(100)               |                 | -1.17          | -1.03          | -1.12          | -1.10          | -1.11          | 0.48           | 1.68              |
| H(100)-1             | 0.53            | -1.06          | -1.02          | -1.01          | -0.98          | -1.04          | -0.16          | 1.66              |
| H(100)-2             | 0.57            | -1.09          | -0.99          | -1.02          | -1.07          | -0.95          | -0.20          | 1.68              |
| H(100)-3             | 0.60            | -1.05          | -1.00          | -0.96          | -0.99          | -0.94          | -0.21          | 1.44              |
| H(100)-4a            | 0.49            | -1.05          | -1.00          | -1.04          | -0.99          | -0.96          | -0.17          | 1.67              |
| H(100)-4b            | 0.51            | -1.06          | -1.00          | -1.00          | -1.07          | -0.93          | -0.12          | 1.55              |

## 6. The charge density difference for different configurations

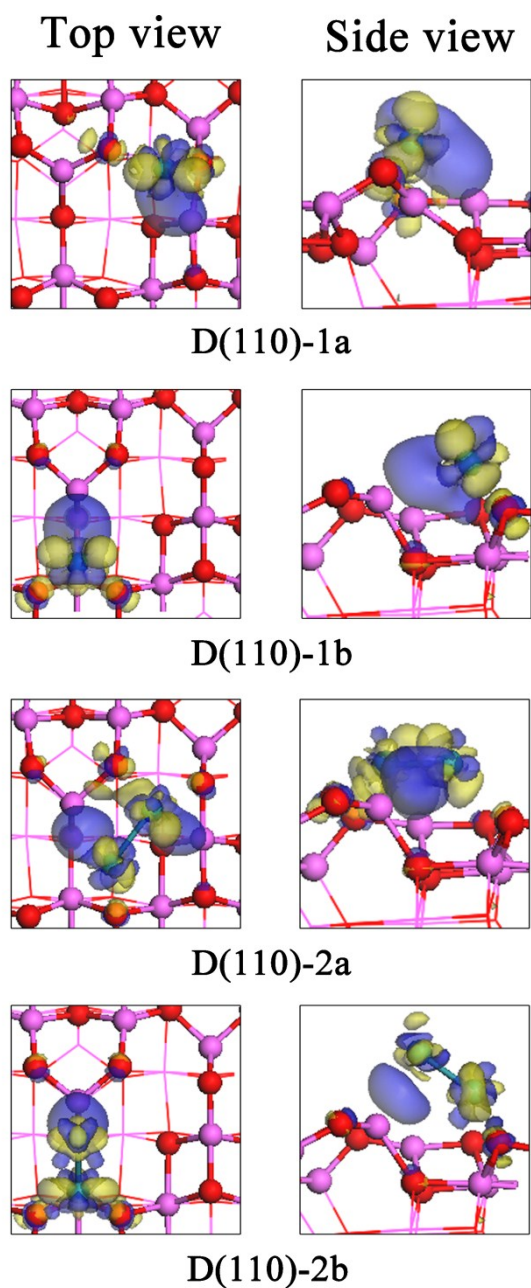

Figure S10. Charge density difference plots for  $Ru_n$  ( $n=1-2$ ) clusters adsorption on dehydrated  $\gamma$ - $Al_2O_3$  (110) surface. The blue region indicates the electron density has been accumulated, conversely, the yellow region indicates the density has been depleted. The iso-surface is 0.05 electrons/ $\text{\AA}^3$ .

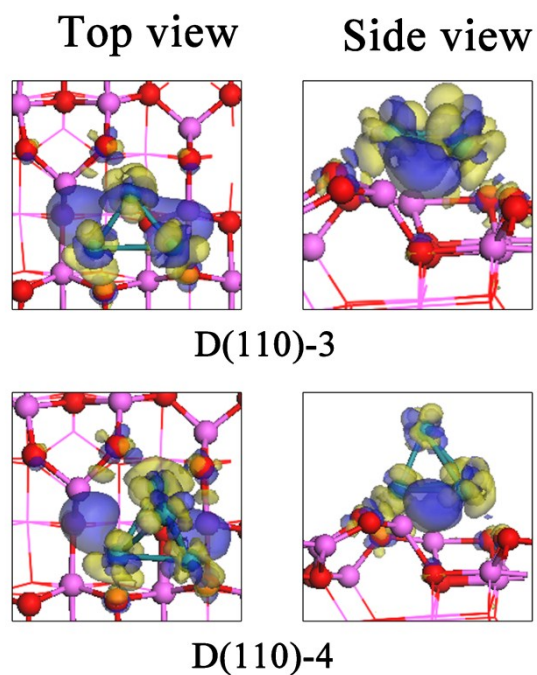

Figure S11. Charge density difference plots for  $\text{Ru}_n$  ( $n=3-4$ ) clusters adsorption on dehydrated  $\gamma\text{-Al}_2\text{O}_3$  (110) surface. The blue region indicates the electron density has been accumulated, conversely, the yellow region indicates the density has been depleted. The iso-surface is 0.05 electrons/  $\text{\AA}^3$ .

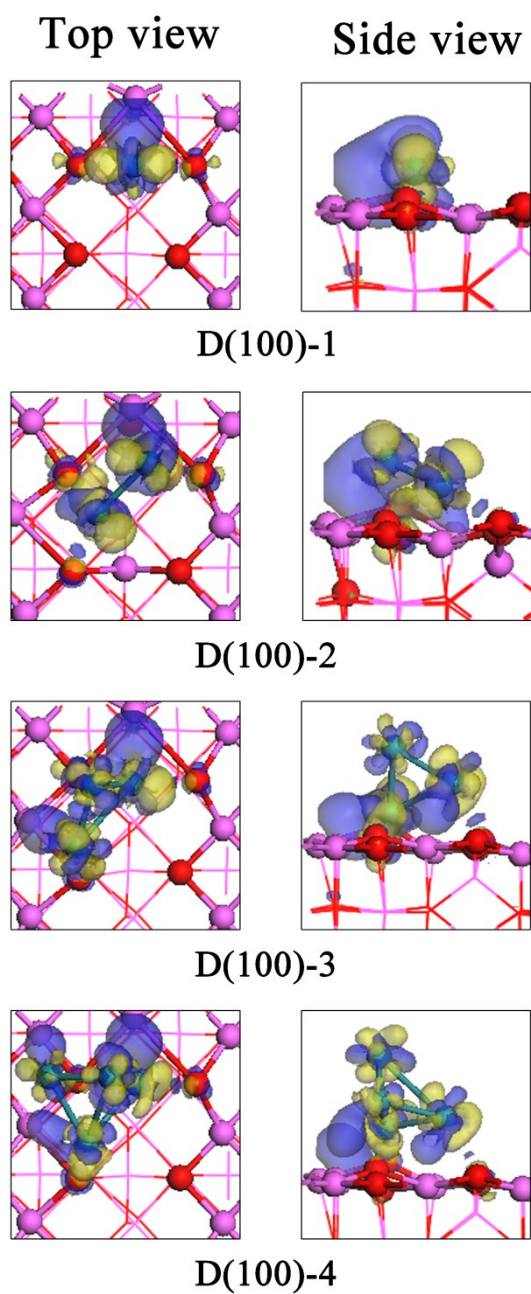

Figure S12. Charge density difference plots for  $Ru_n$  ( $n=1-4$ ) clusters adsorption on dehydrated (100) surface. The blue region indicates the electron density has been enriched, conversely, the yellow region indicates the density has been depleted. The iso-surface is 0.05 electrons/  $\text{\AA}^3$ .

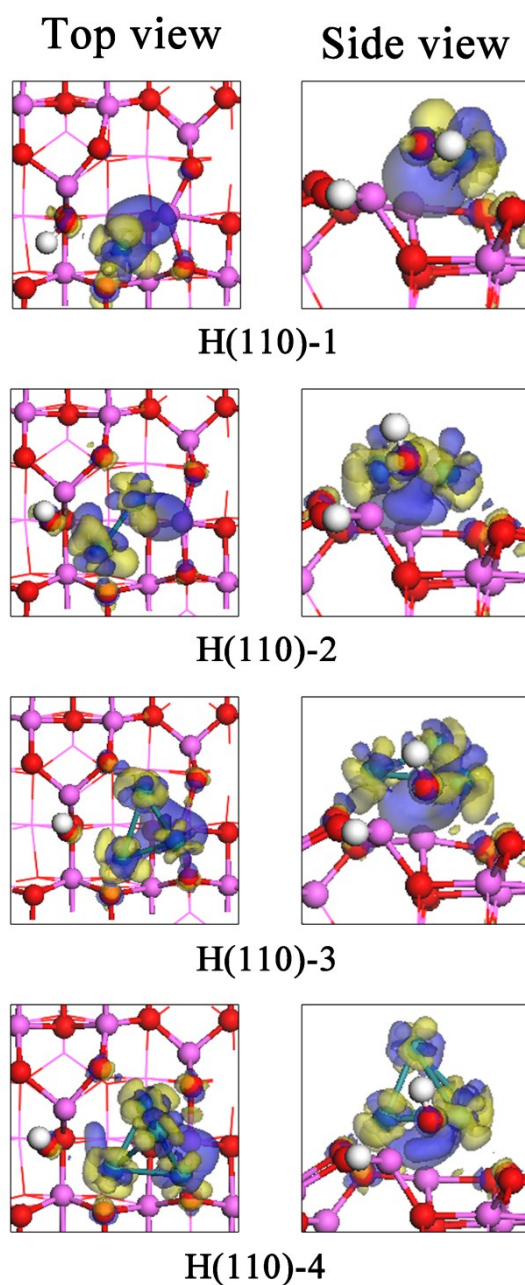

Figure S13. Charge density difference plots for  $Ru_n$  ( $n=1-4$ ) clusters adsorption on hydrated (110) surface. The blue region indicates the electron density has been enriched, conversely, the yellow region indicates the density has been depleted. The iso-surface is  $0.05 \text{ electrons}/\text{\AA}^3$ .

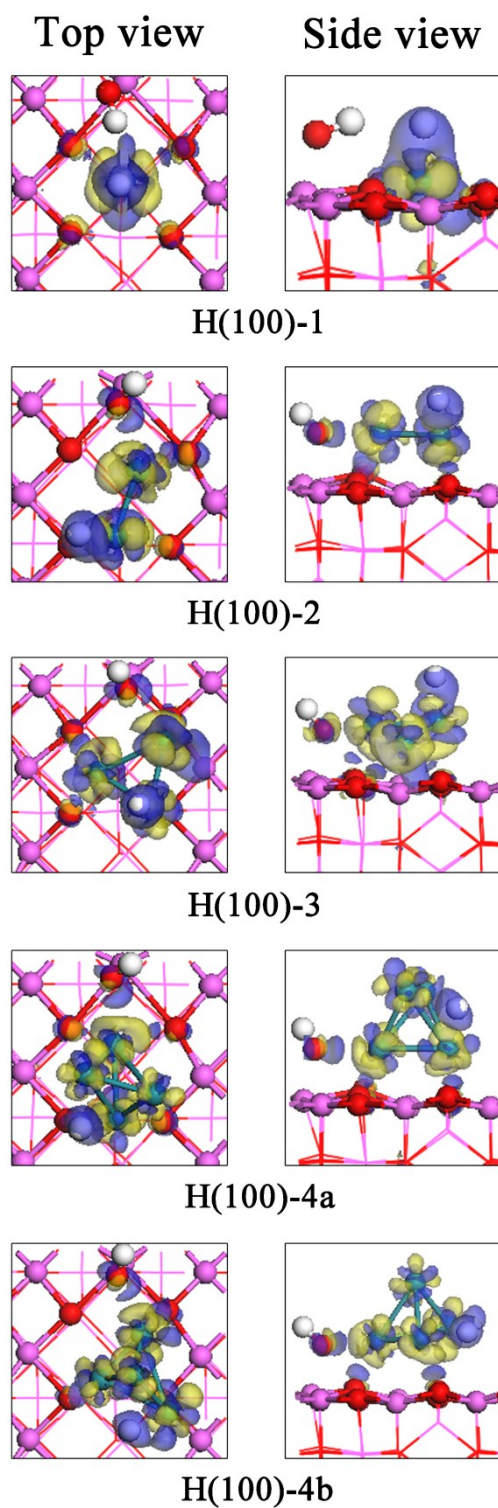

Figure S14. Charge density difference plots for  $Ru_n$  ( $n=1-4$ ) clusters adsorption on hydrated (100) surface. The blue region indicates the electron density has been enriched, conversely, the yellow region indicates the density has been depleted. The iso-surface is 0.05 electrons/  $\text{\AA}^3$ .

## 7. The PDOS for atoms of different surfaces

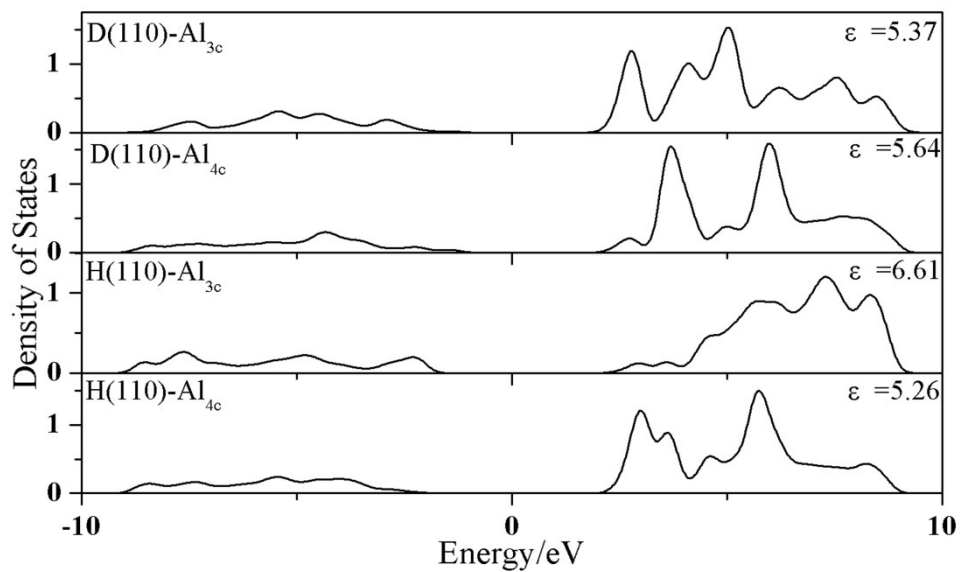

Figure S15. Project density of States (PDOS) for the Al atoms on the dehydrated (110) and hydrated (110) surface. The Fermi level was set at zero energy.

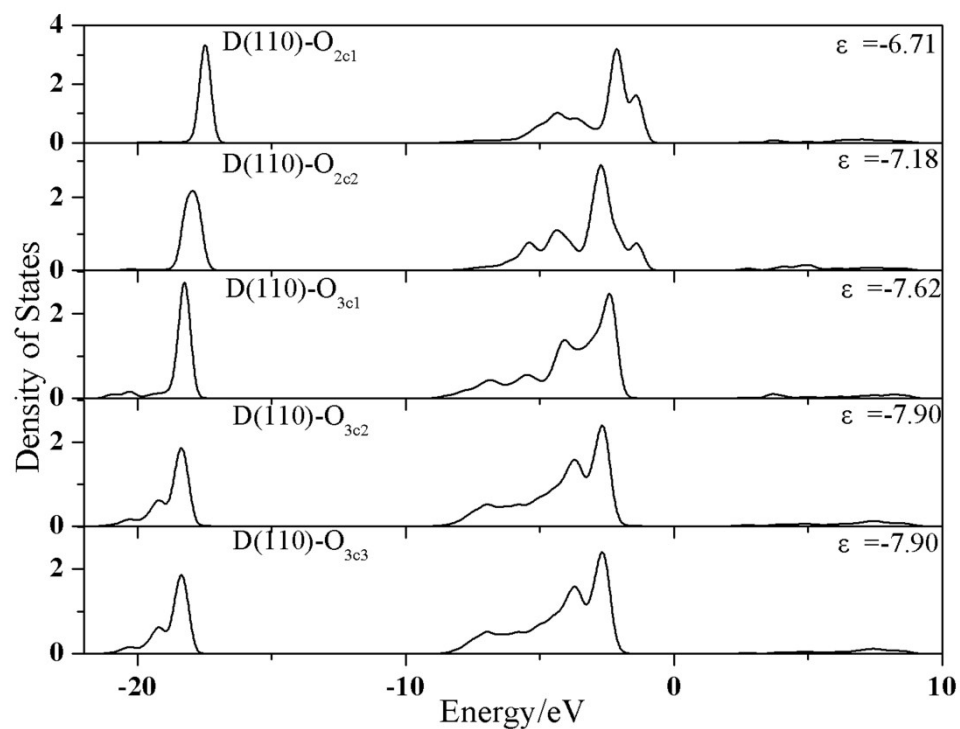

Figure S16. Project density of States (PDOS) for the O atoms on the dehydrated (110) surface. The Fermi level was set at zero energy.

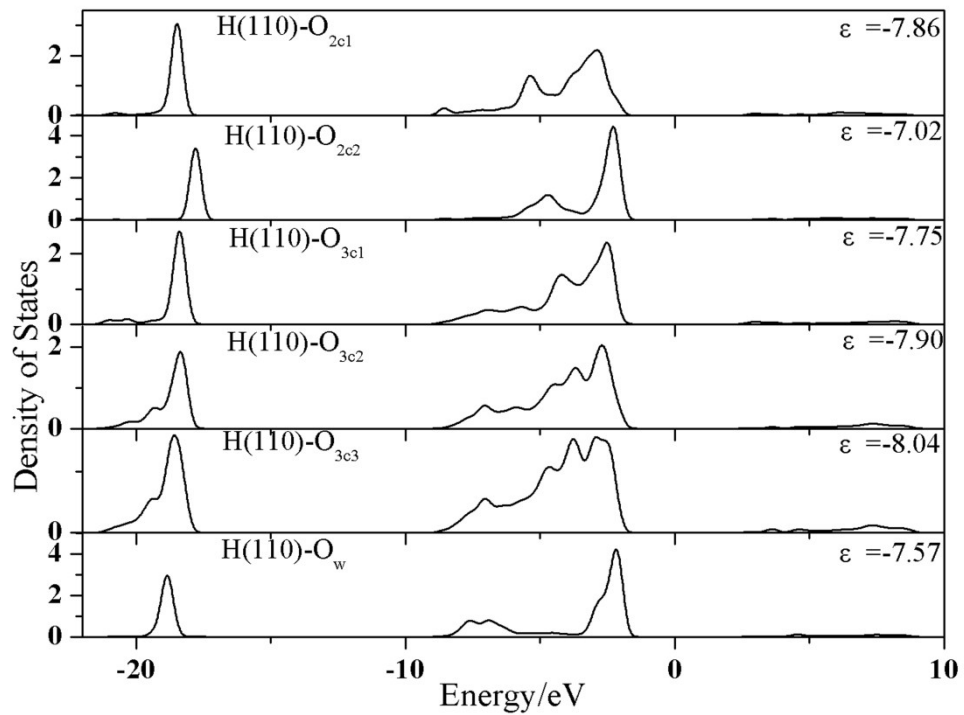

Figure S17. Project density of States (PDOS) for the O atoms on the hydrated (110) surface. The Fermi level was set at zero energy.

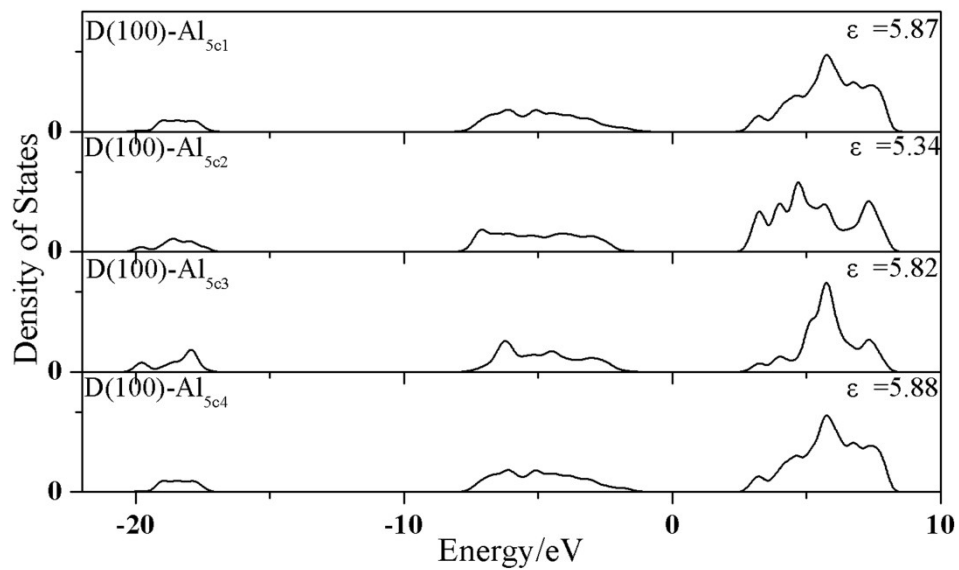

Figure S18. Project density of States (PDOS) for the Al atoms on the dehydrated (100) surface. The Fermi level was set at zero energy.



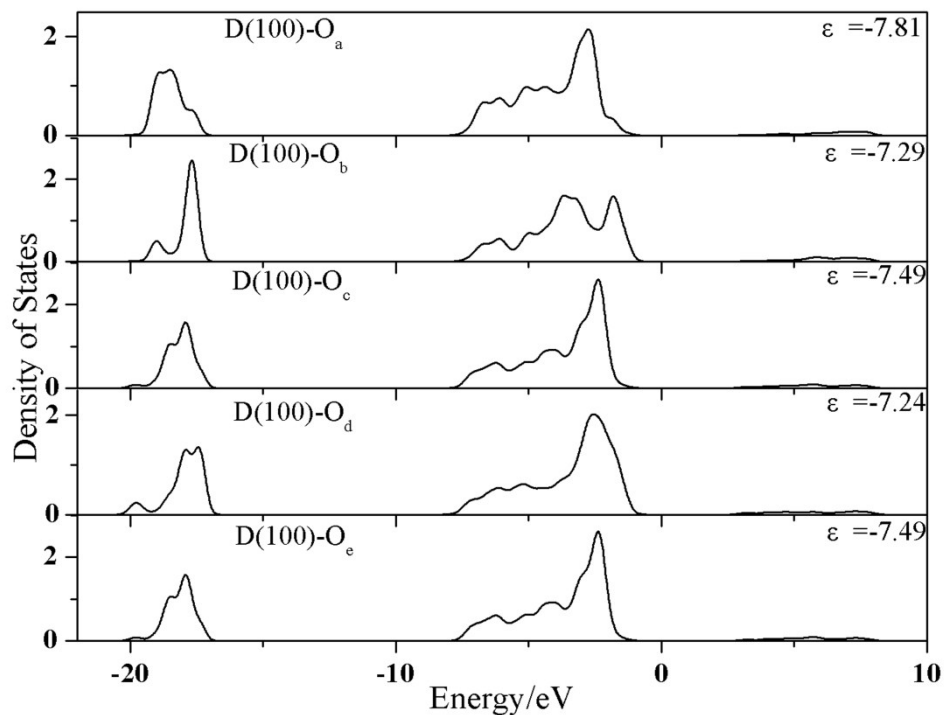

Figure S19. Project density of States (PDOS) for the O atoms on the dehydrated (100) surface. The Fermi level was set at zero energy.

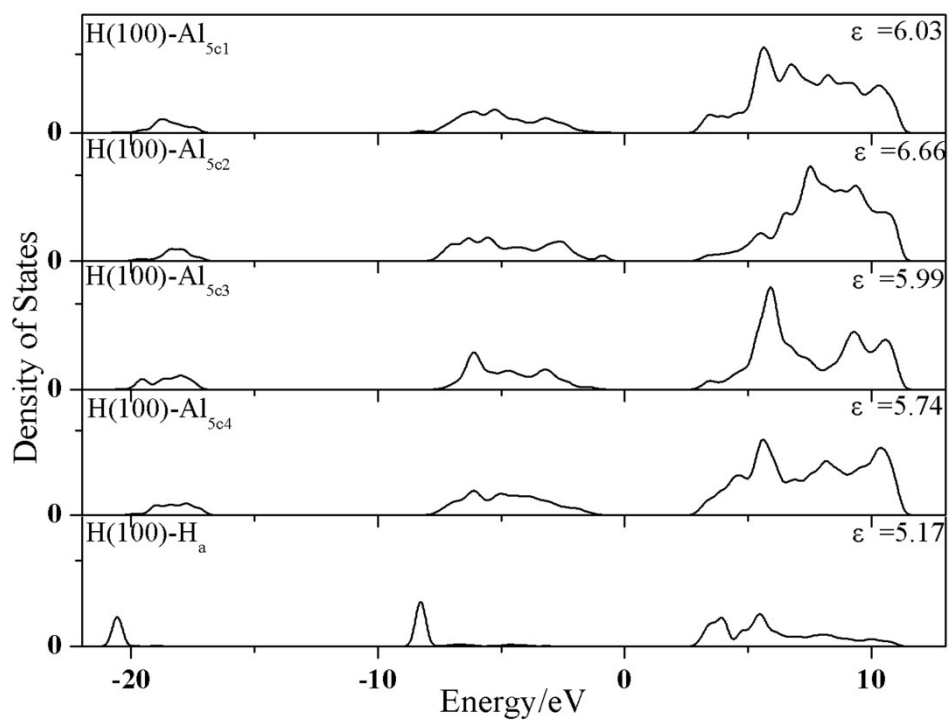

Figure S20. Project density of States (PDOS) for the Al atoms on the hydrated (100) surface. The Fermi level was set at zero energy.

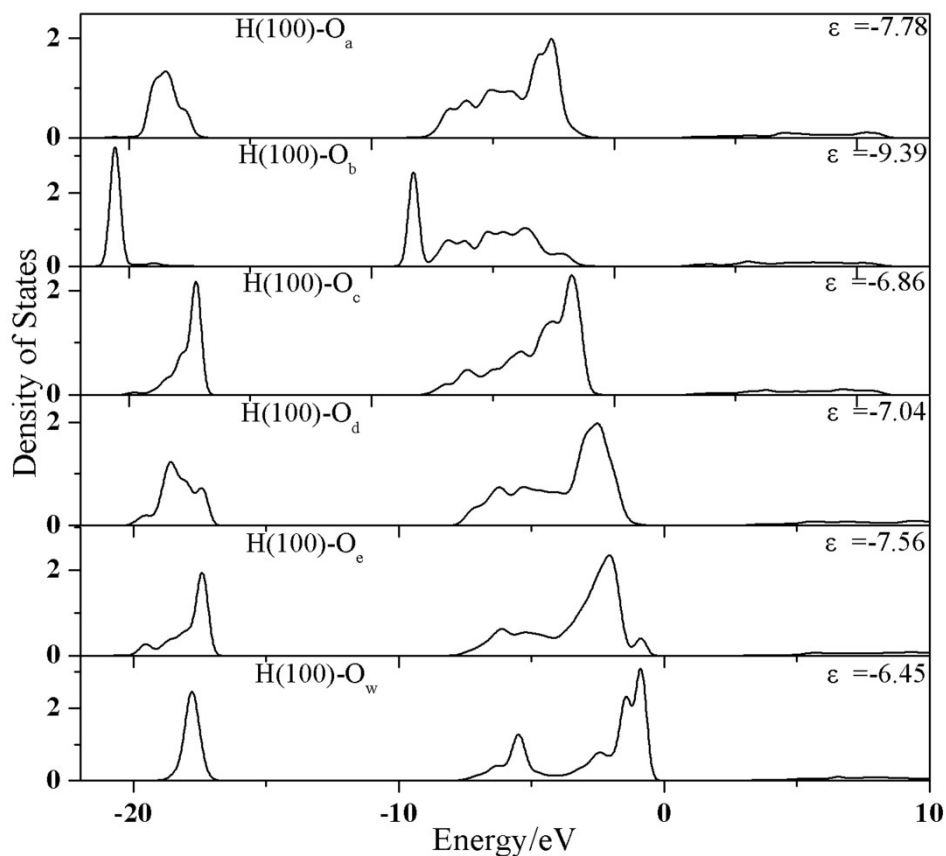

Figure S21. Project density of States (PDOS) for the O atoms on the hydrated (100) surface. The Fermi level was set at zero energy.

## 8. The relationship between ( $\epsilon_{Al} - \epsilon_O$ ) values and interaction energies

We fit the interaction energy data to the following linear form

$$E_{\text{int}} = k(\epsilon_{Al} - \epsilon_O) + b$$

The results in Figure S22 clearly show that interaction energies increase with the ( $\epsilon_{Al} - \epsilon_O$ ) values (i.e., stronger Lewis acid-basicity pair leads to stronger interaction). It should be noted that there is a good relations between interaction energies and ( $\epsilon_{Al} - \epsilon_O$ ) values for  $Ru_4$  cluster adsorption. The parameters are 3.15 for  $k$  and -46.4 for  $b$ .

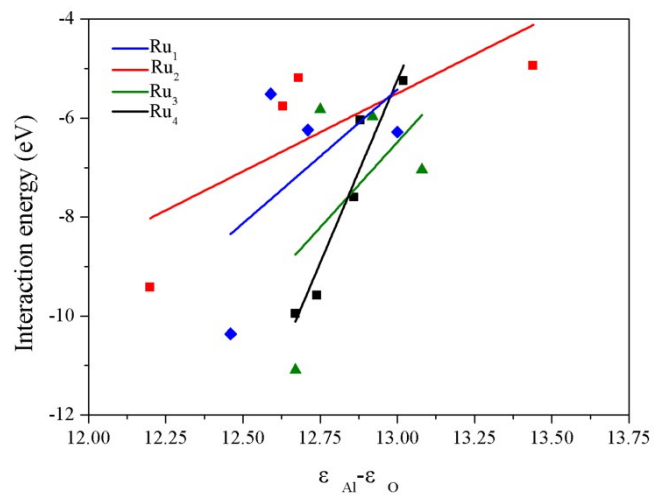

Figure S22. Interaction energies vs  $(\epsilon_{Al} - \epsilon_O)$  for the involved sites in bonding states for Ru<sub>n</sub>.
